# Supplementary material for: Patient Experience of Sjögren’s Disease and its Multifaceted Impact on Patients’ Lives
Source: PubMed Central journal article supplement — Rheumatol Ther. 2023 Feb 16;10(3):601–14. doi: 10.1007/s40744-023-00531-7 (PMC10140221; doi:10.1007/s40744-023-00531-7), 2023-02-16

## SUPPLEMENTARY MATERIAL

### Patient Experience of Sjögren's Disease and its Multifaceted Impact on Patients' Lives

Chiara Perella<sup>1</sup>, Monia Steenackers<sup>1</sup>, Brian Robbins<sup>1</sup>, Linda Stone<sup>2</sup>, Rachel Gervais<sup>3</sup>, Theresa Schmidt<sup>3</sup> (ORCID: 0000-0002-3550-4060), Pushpendra Goswami<sup>1</sup> (ORCID: 0000-0002-3171-2495)

#### Affiliations:

<sup>1</sup>Novartis Pharma AG, Basel, Basel-Stadt, Switzerland

<sup>2</sup>The British Sjögren's Syndrome Association, Birmingham, UK

<sup>3</sup>Real Chemistry, New York, NY, USA

#### Corresponding author:

P. Goswami, PhD

Novartis Pharma AG,

Fabrikstrasse 2, 4056 Basel,

Switzerland

E-mail: [pushpendra.goswami@novartis.com](mailto:pushpendra.goswami@novartis.com)

**Supplementary Figure S1. Breakdown of Top Five Symptom Domains and HRQoL Impact Domains**

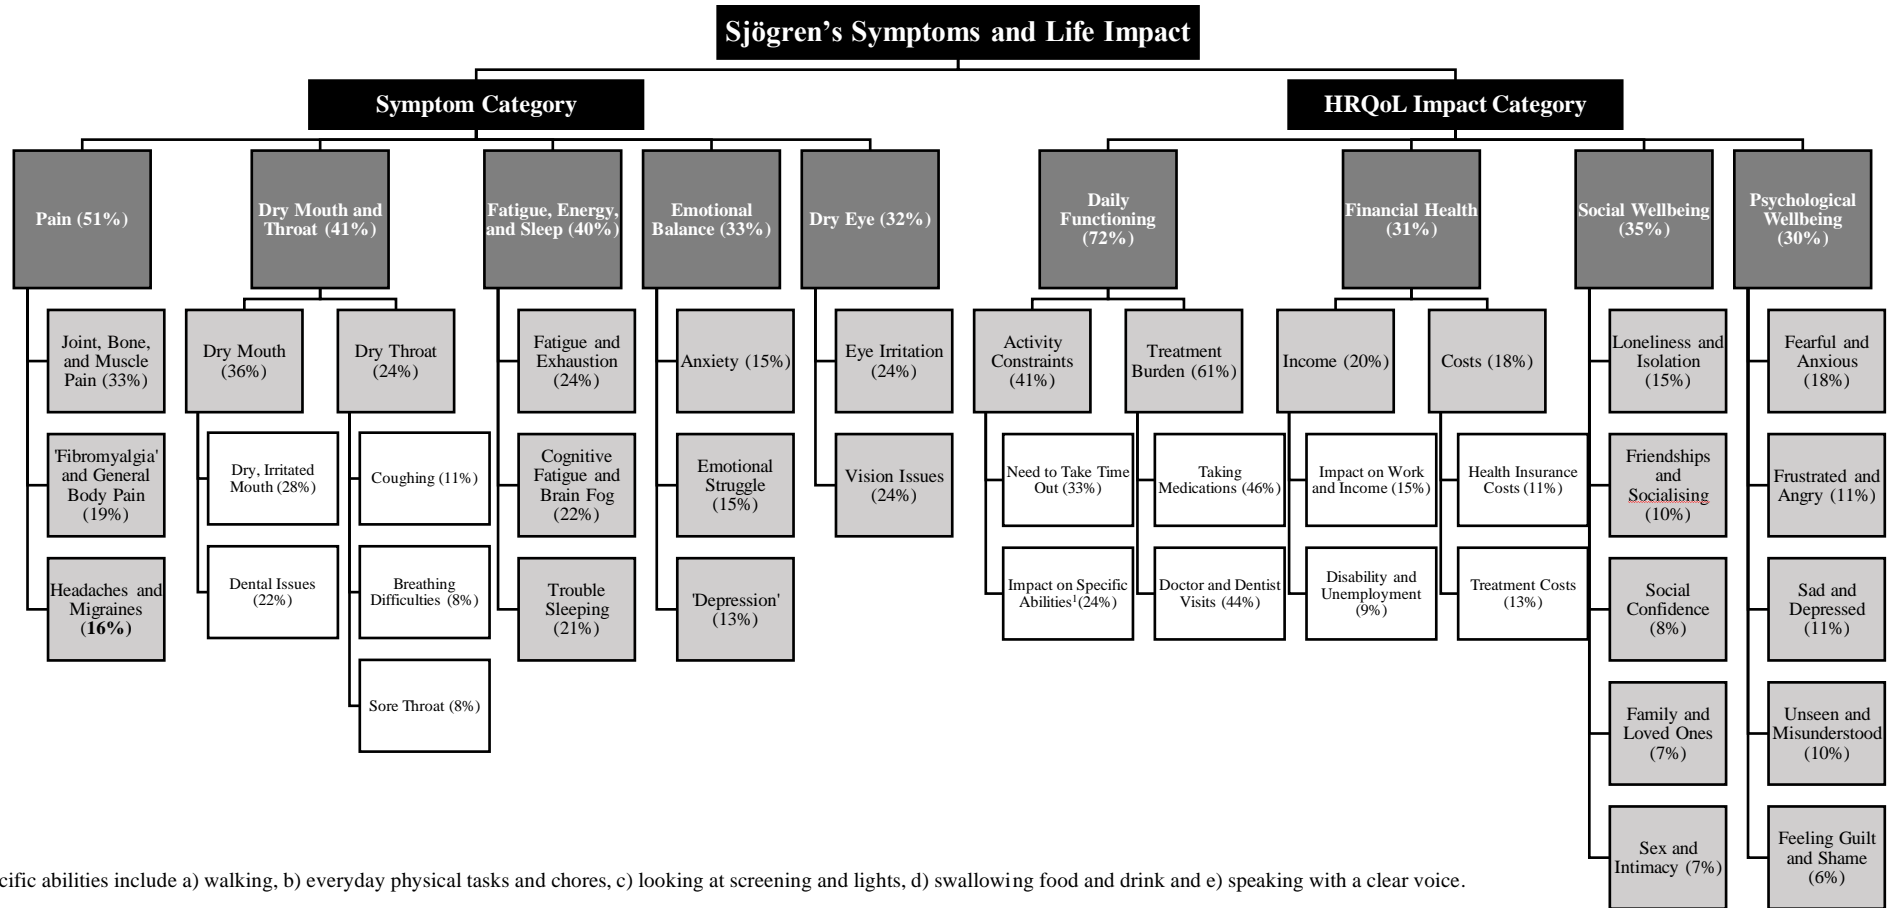

| Shading Key |                              |
|-------------|------------------------------|
|             | Symptom or HRQoL Category    |
|             | Symptom or HRQoL Domain      |
|             | Symptom or HRQoL Concept     |
|             | Symptom or HRQoL Sub-concept |

**Supplementary Figure S2.** Commonness of Symptom Domains Across Patient Posts

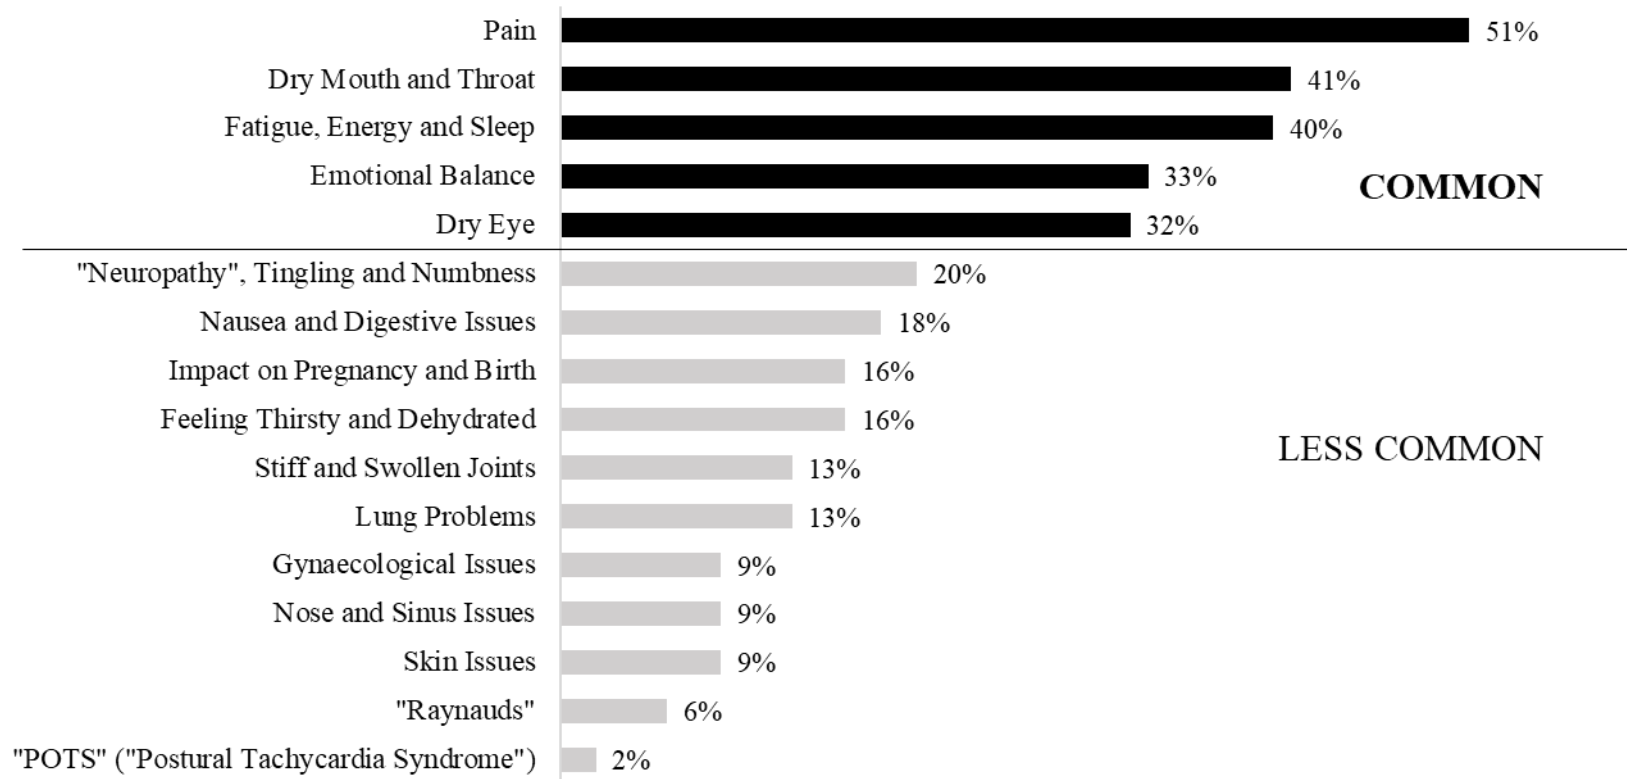

**Supplementary Figure S3. Symptom Domain Associated Botheredness Across Patient Posts**

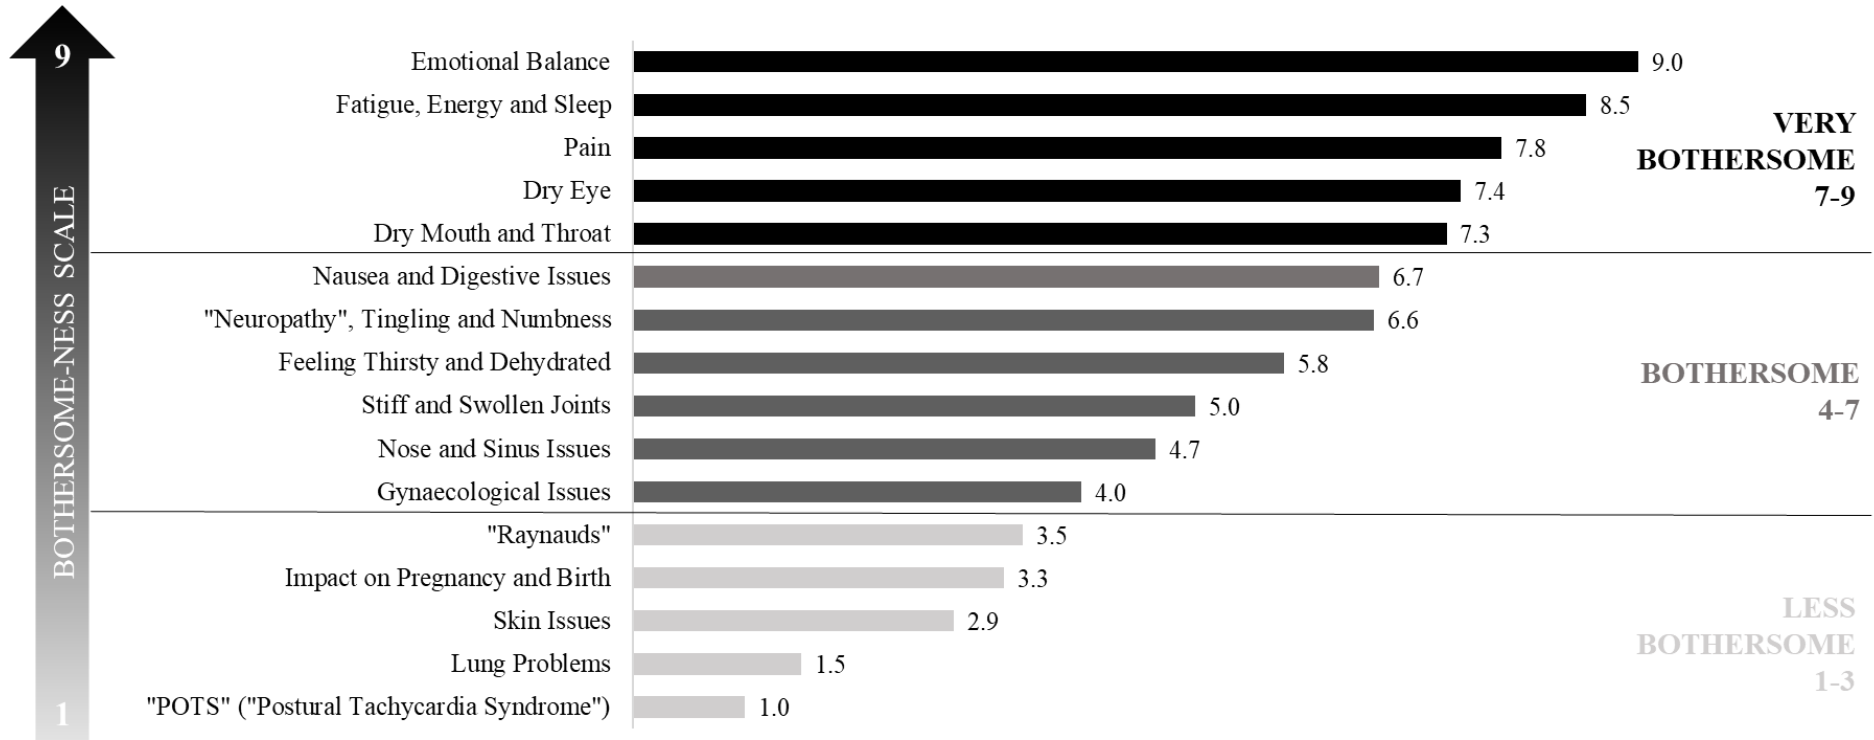

Supplement: 40744_2023_531_MOESM1_ESM.pdf [file 40744_2023_531_MOESM1_ESM.pdf]
